# Supplementary material for: A bioclinical prognostic model using MYC and BCL2 predicts outcome in relapsed/refractory diffuse large B-cell lymphoma
Source: PubMed Central journal article supplement — Haematologica. 2017 Nov 2;103(2):288–96. doi: 10.3324/haematol.2017.179309 (PMC5792273; doi:10.3324/haematol.2017.179309), 2018-02
Supplement: HAEMATOL-2017-179309v3-Stewart-01.pdf [file HAEMATOL-2017-179309v3-Stewart-01.pdf]

# Combination of clinical and molecular predictors to create a novel bio-clinical score that predicts outcome in relapsed/refractory diffuse large B-cell lymphoma

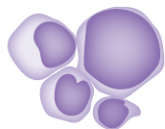

Relapsed/refractory diffuse large B-cell lymphoma (rrDLBCL)

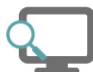

Bio-clinical model

for event-free (EF) and overall survival (OS) of rrDLBCL patients

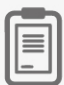

## Clinical predictors

- Primary refractory disease
- Elevated serum LDH at relapse

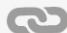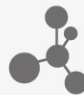

## Molecular predictors

- MYC expression
- BCL2 expression

## Analyses

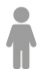

91

Immunohistochemistry (IHC)

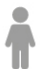

97

Digital gene expression profiling (GEP)

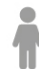

67

Fluorescence in situ hybridization (FISH)

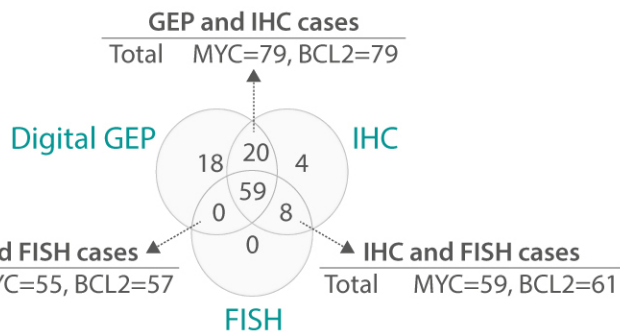

## Multivariate analysis: 3-year EFS rate

|             | <b>Bio-clinical score</b> |                 |
|-------------|---------------------------|-----------------|
| MYC, BCL2   | 0-1 (Low Risk)            | 2-4 (High Risk) |
| IHC         | 55%                       | 16%             |
| Digital GEP | 46%                       | 5%              |
| FISH        | 42%                       | 21%             |
